# Supplementary material for: Young Patients with Suspected Uncomplicated Renal Colic are Unlikely to Have Dangerous Alternative Diagnoses or Need Emergent Intervention
Source: PubMed Central journal article supplement (PMC4380378; doi:10.5811/westjem.2015.1.23272), 2015-03-13
Supplement: wjem-16-269-s001.pdf [file wjem-16-269-s001.pdf]

## Nephrolithiasis

### Retrospective Chart Review of Patients with Final Diagnosis of Nephrolithiasis: Can We Safely Decrease CT Scan Use? [Principle Investigator: Schoenfeld, Elizabeth] DATA COLLECTION FORM

1. Subject Study ID: \_\_\_\_\_
2. MRN: \_\_\_\_\_
3. Inclusion: Age >17  - Y  - No (do not continue)
4. Exclusion: Pregnant  - Y (do not continue)  - No
- 5a. Gender:  - male  - female
- 5b. Ethnicity:  - white,  - black,  - asian,  - hispanic,  - other, 6 - unk
6. Date of visit:
7. History of kidney stones:  - Yes  - no
8. History of intervention for KS:  - Yes  - no (intervention \_\_\_\_\_)
9. Medical History:
  - a. none
  - b. DM
  - c. HTN
  - d. CAD
  - e. pancreatitis
  - f. gallstones
  - g. renal disease
  - h. AAA
  - i. abdominal surgery
  - j. Cancer (type \_\_\_\_\_)
10. Coumadin  - yes  - no
11. Recent trauma  - yes  - no

| Triage Vital Signs     |  |
|------------------------|--|
| 12. Temperature ( F/C) |  |
| 13. Pulse              |  |
| 14. Systolic BP        |  |
| 15. Diastolic BP       |  |

#### Chief Complaint:

16. Location:  - right,  - left,  - both
17.  - flank,  - back,  - abdominal,  - more than one, (\_\_\_\_\_)
- 18a. Duration: \_\_\_\_\_ hrs

## Nephrolithiasis

18b.  - <6,  - 6-24,  - 24-48,  - 48hrs -1 week,  - >1 week

19. Physical Exam: Abdominal tenderness noted: - no,  – mild, - moderate,  – severe; Location:  RUQ,  LUQ,  RLQ,  LLQ,  Diffuse,  Epigastric

19b. Presence of Nausea and vomiting:  – none,  – nausea alone,  – nausea and vomiting

### Testing:

20. Udiip done  - y,  - n

21. Blood -y,  - n

22. Leuks - y,  -n

23. nitritis  - y, - n

24. Formal UA: - y,  - n

25. RBCs # \_\_\_\_\_,

26. WBC # \_\_\_\_\_

27. Cr done  - Y,  - N, # \_\_\_\_\_

28. WBC done - Y, - N, # \_\_\_\_\_

29. CT abd done  - y  - no

30. CT renal protocol - y,  - n

31. CT - renal,  - W IV contrast,  - with po (+/- IV)

32. Bedside Ultrasound  - y,  - no

33. CT results: diagnostic of PAIN  - y,  - N,  - unk

34. Findings:  - no CT,  - normal,  - KS  $\leq$ 5mm, - KS  $\geq$  5mm,  - finding requiring urgent/emergency FU/intervention (\_\_\_\_\_),  - finding requiring non-urgent or no FU (\_\_\_\_\_)

35. Stone size \_\_\_\_\_; Location:  – Prox;  – Mid;  UVJ;  bladder

36. CT Hydronephrosis L:  - none,  - mild,  - moderate,  - severe,  - hydro NOS

37. CT Hydronephrosis R:  - none,  - mild,  - moderate, - severe,  - hydro NOS

38. Bedside US L:  - normal,  - mild hydro,  - moderate,  - severe

39. Bedside US R:  - normal,  - mild hydro,  - moderate,  - severe

40. Formal US L :  - normal,  - mild hydro,  - moderate,  - severe

41. Formal US R :  - normal,  - mild hydro,  - moderate,  - severe

42. Final ED diagnosis:  - kidney stone,  - other (\_\_\_\_\_)

43. Disposition:  - admitted,  - discharged

44. If admitted: intervention during this hospitalization:  - urological,  - other surgical,  - none (\_\_\_\_\_)

45. Return to ED within 60 days: - yes,  – no; related  –Y, -N

46. Final Diagnosis second visit: \_\_\_\_\_

47. Admitted:  - yes,  - no

48. Intervention/procedure:  - yes,  - no \_\_\_\_\_

## Nephrolithiasis

49. Any visits in 60 days requiring urological intervention  - y,  - n

50. Stone Score: total \_\_\_\_\_

| Factor          | Categories              | Points |
|-----------------|-------------------------|--------|
| Sex             | Male                    | 2      |
| Timing of pain  | <6 hours                | 3      |
|                 | 6-24                    | 1      |
|                 | >24                     | 0      |
| Origin (race)   | Non-black               | 3      |
|                 | Black                   | 0      |
| Nausea/vomiting | Both N and V            | 2      |
|                 | Nausea alone            | 1      |
| Erythrocytes    | Pos urine dip or rbc >4 | 3      |

51. Stones score Categorical  – 0-5 ;  6-9,  10-13
